# Supplementary material for: Large-scale phylogenomics of the genus Macrostomum (Platyhelminthes) reveals cryptic diversity and novel sexual traits
Source: bioRxiv or medRxiv preprint supplement (doi:10.1101/2021.03.28.437366), 2021-03-29

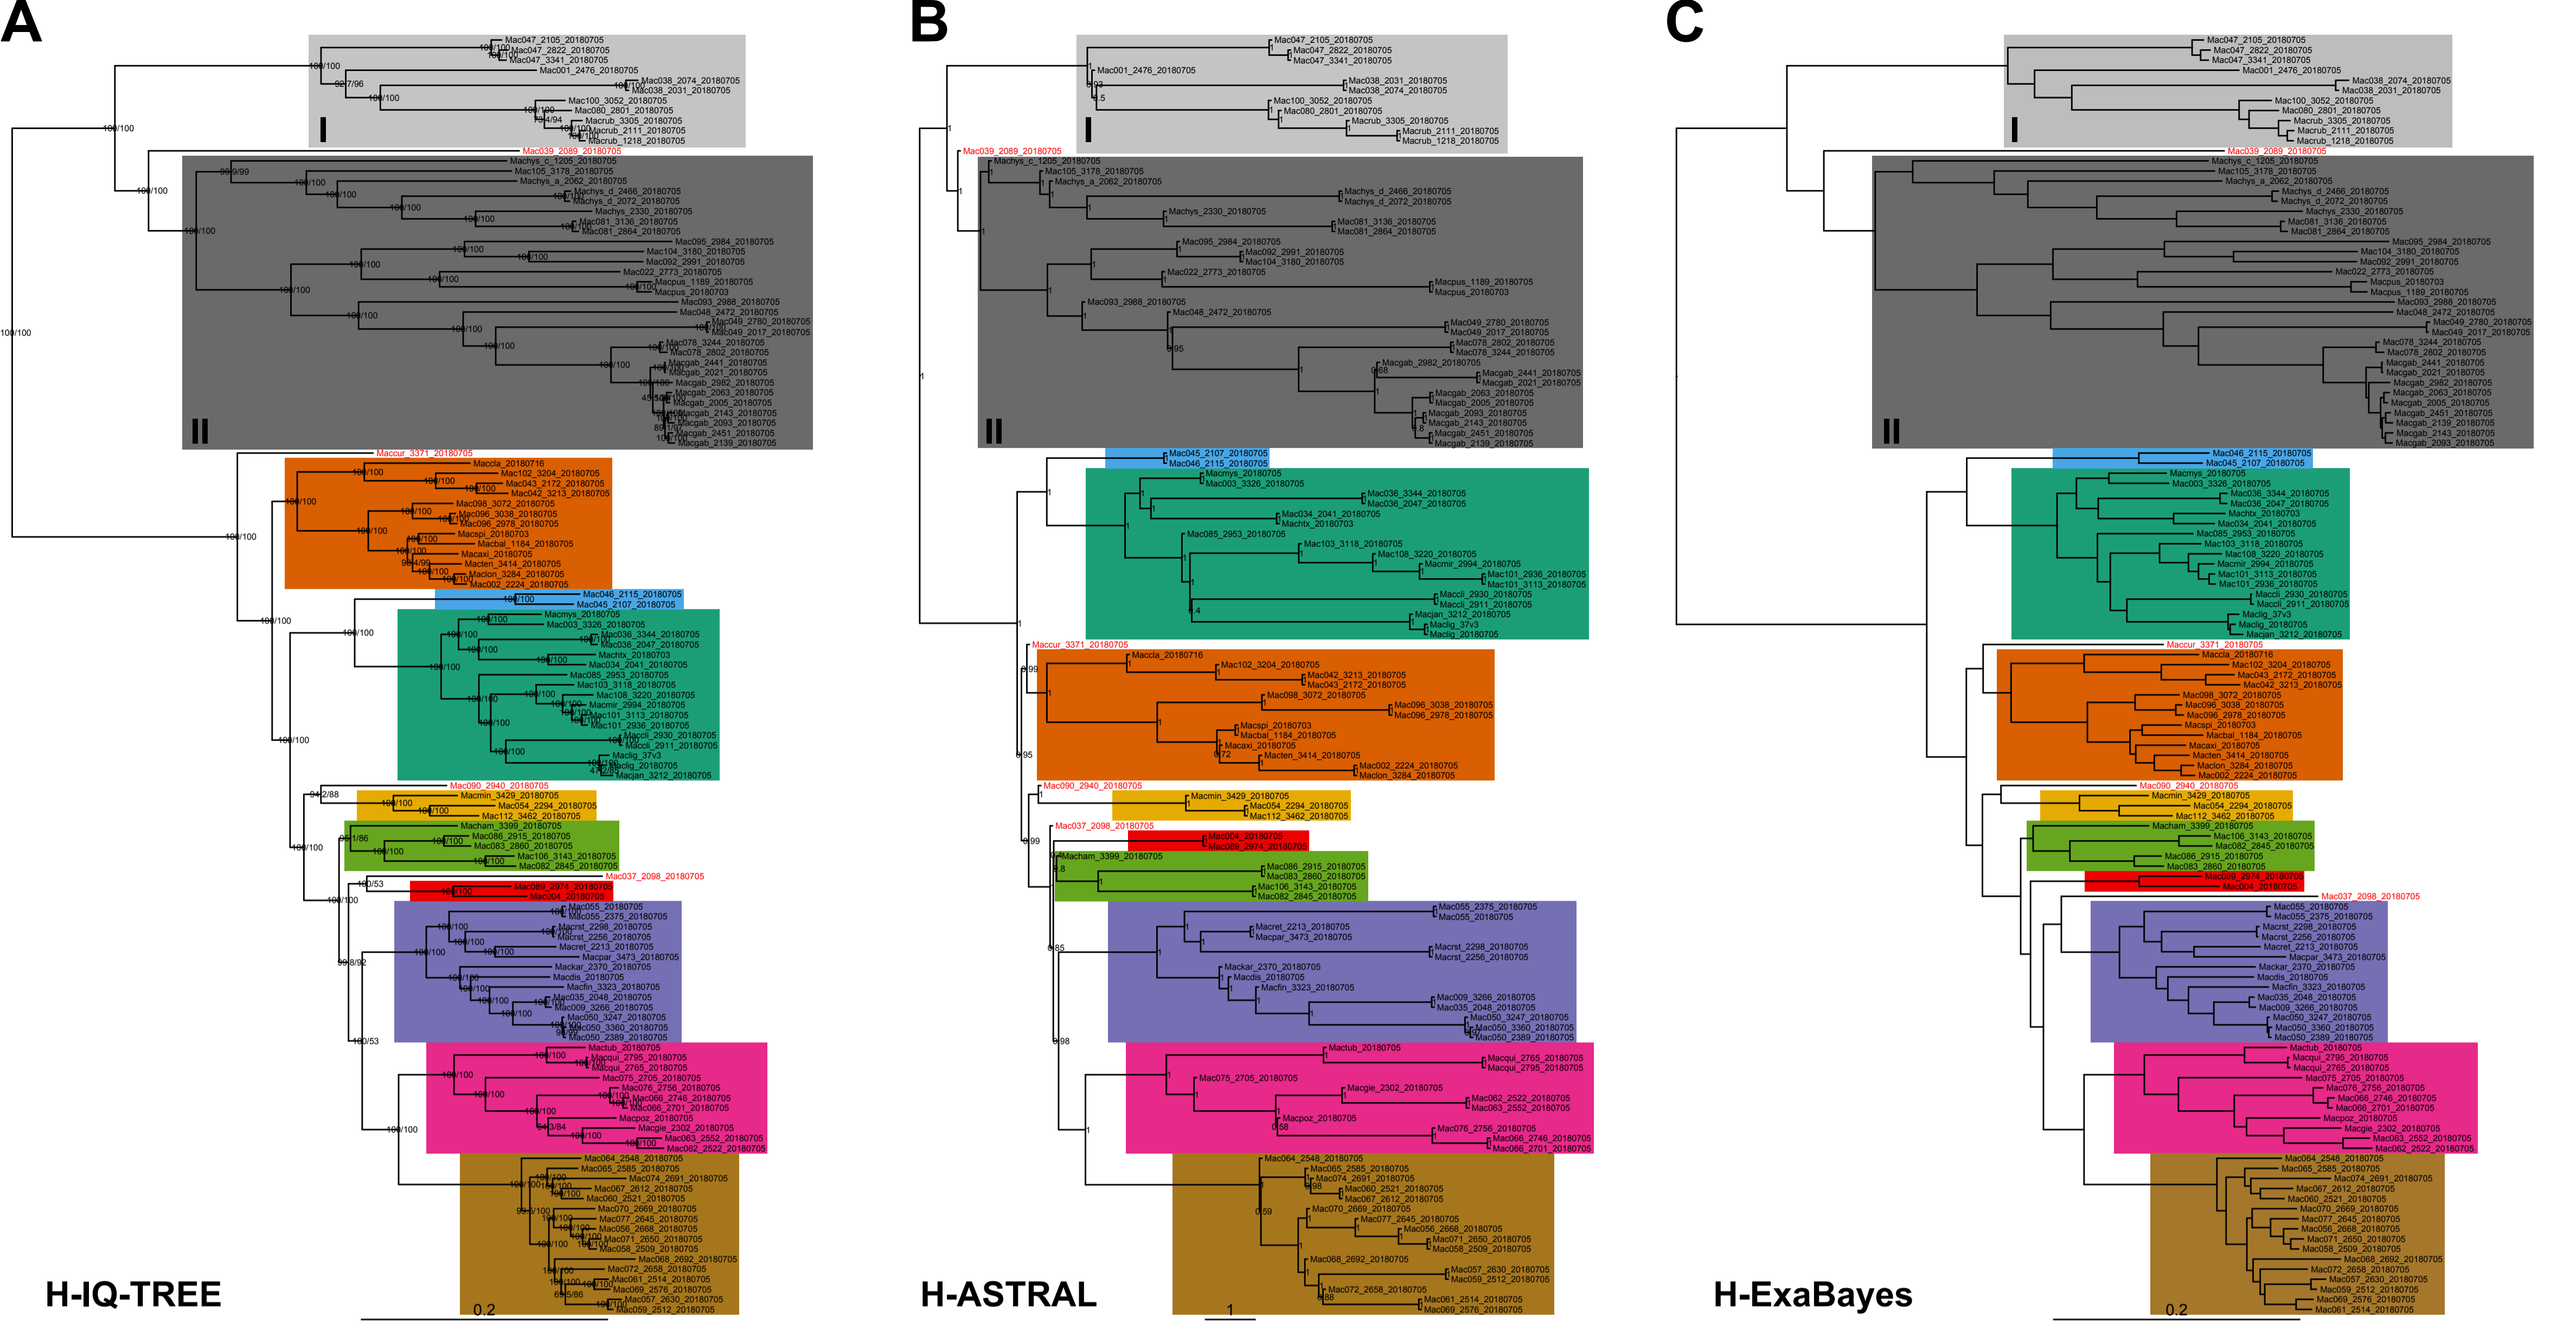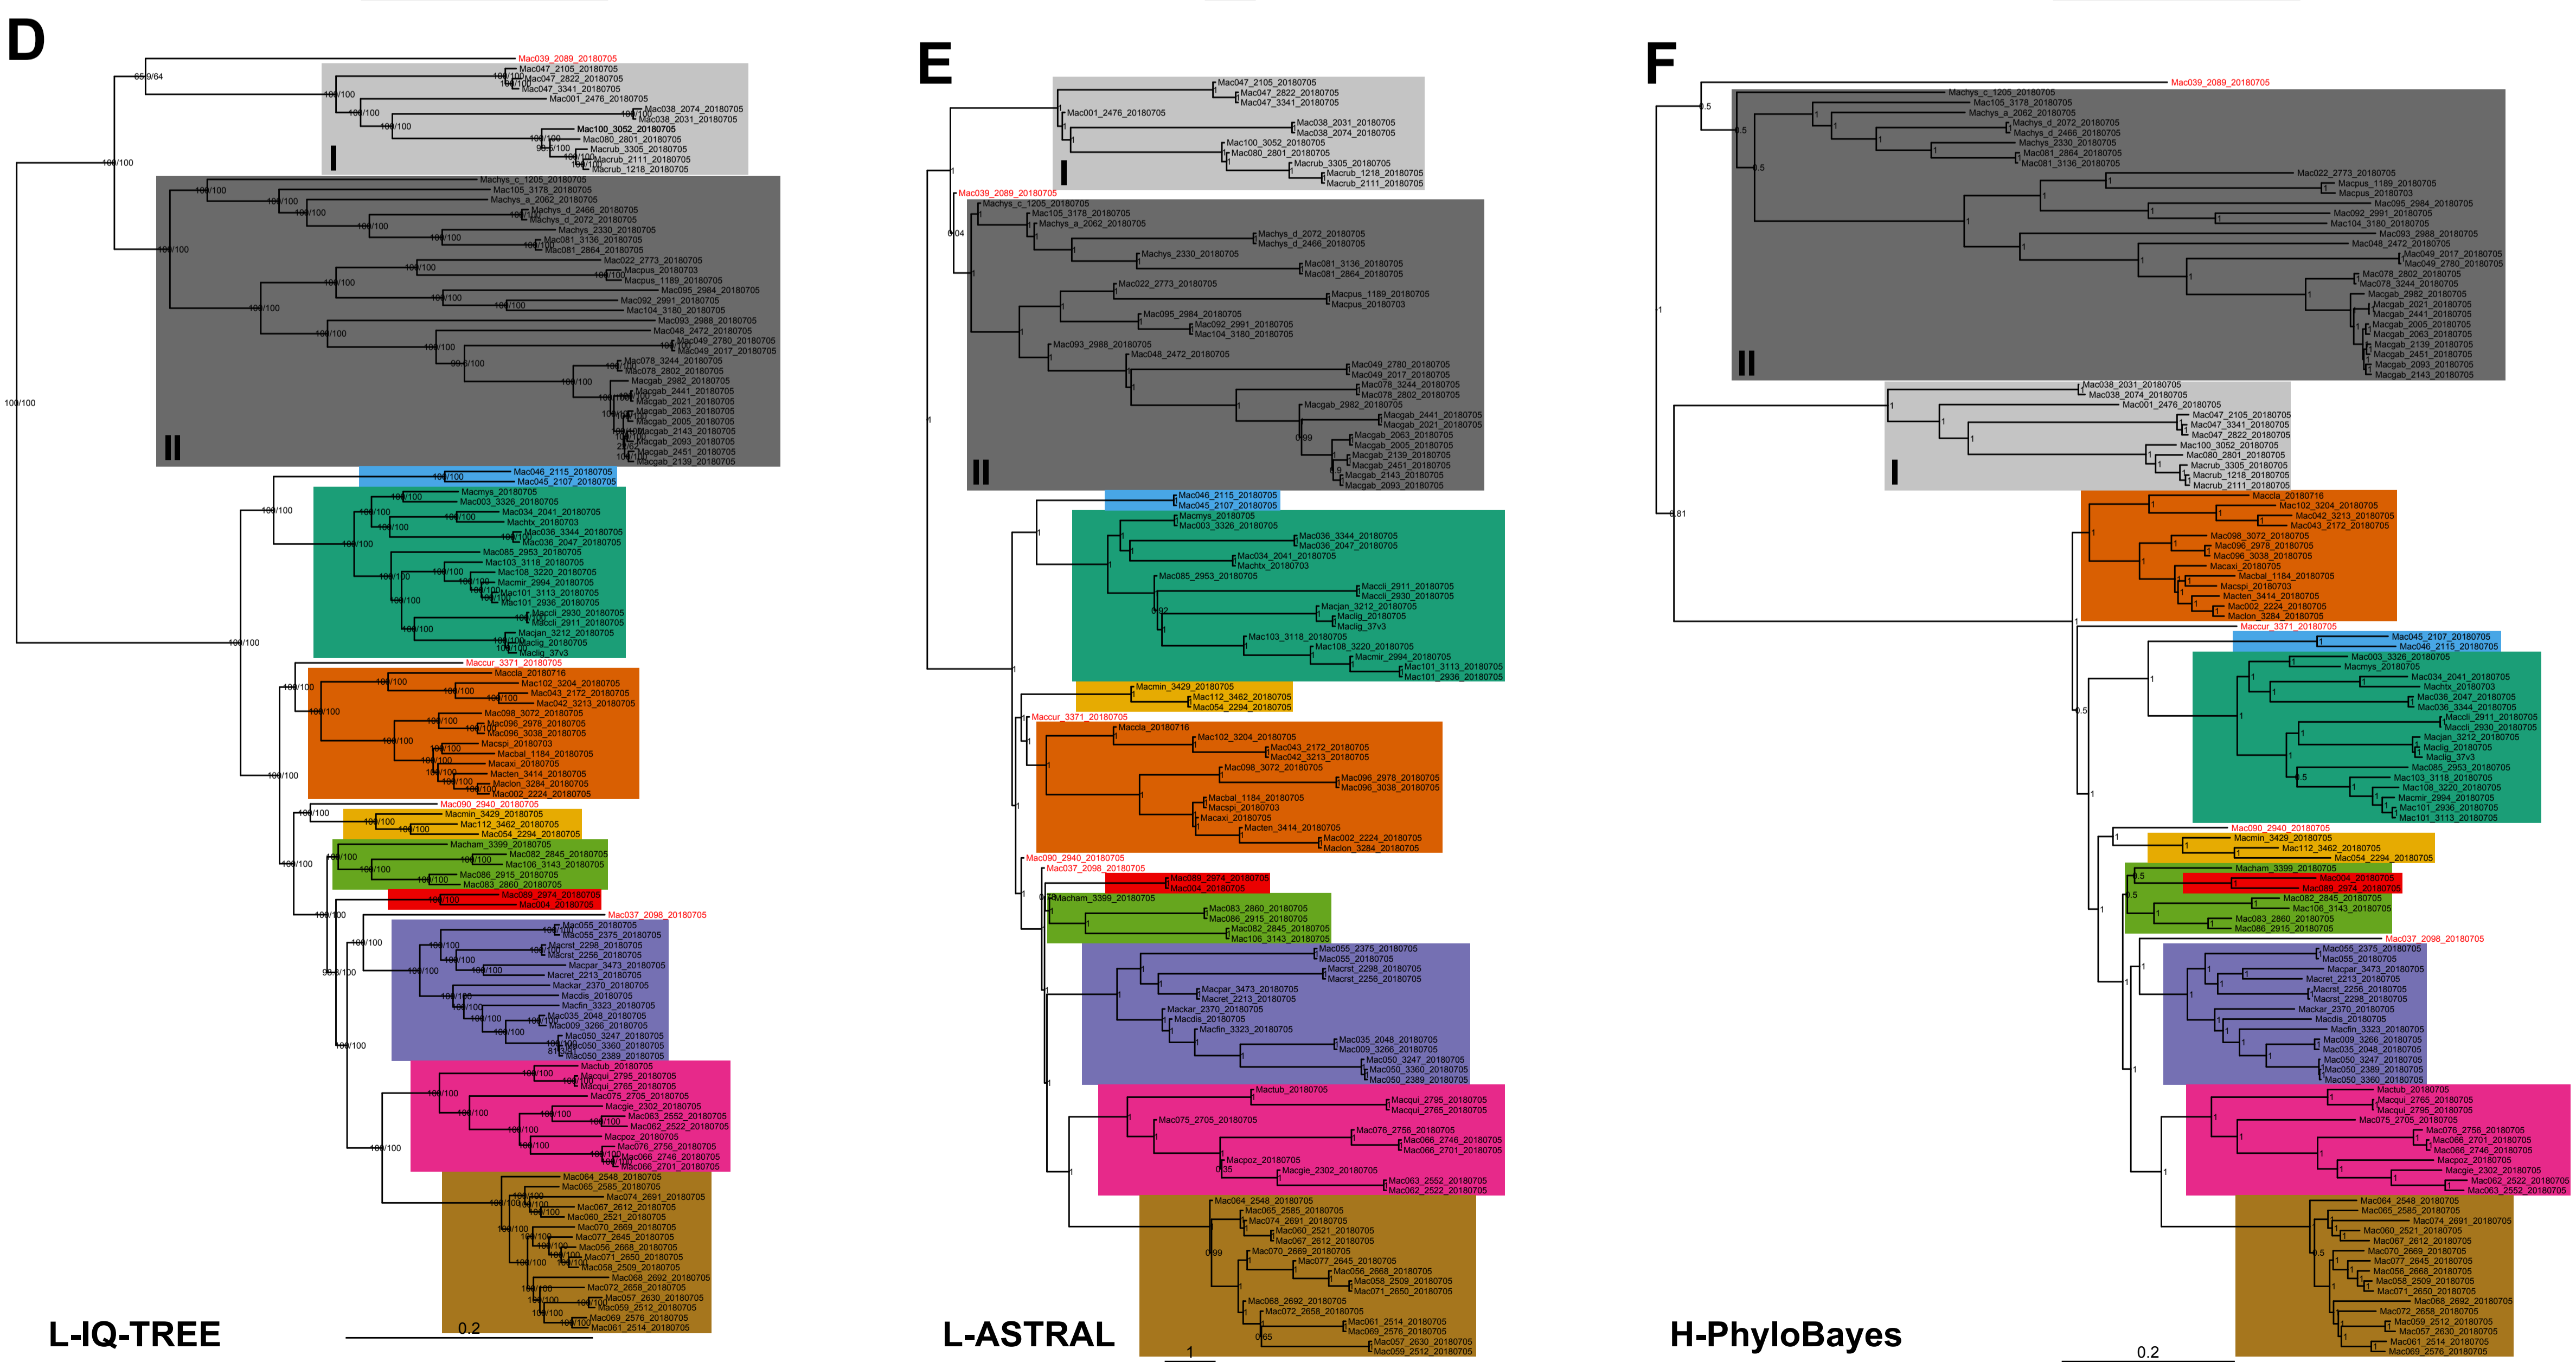

Supplement: Supplementary file [file media-5.pdf]
